vaporizer. For draining, the rotary valve should be "Open" after the empty correct bottle is connected in the upright position.

This system uses only one keyed connection, and eliminates the need for the second special connection between the filling adaptor and the filler receptacle that is essential to the Cyprane system. Because there is no flexible tube adaptor being used, liquid flow for filling or draining is almost twice as fast as with the Cyprane system. Once the bottle is directly screwed onto the vaporizer, the bottle can stay in the appropriate position either for filling or for emptying, and no hands are needed to hold the bottle during such procedures. To refill the vaporizer, a liquid anesthetic bottle can stay even at the upside-down position during a long anesthetic case, and just opening the valve (after the vaporizer has been turned off) will do it. All maneuvers are

very simple and self-explanatory. We have used this device in daily practice, and, so far, have found that it is satisfactorily efficient and robust over 1 yr.

TORU SATO, M.D.  
*Professor and Chairman of Anesthesiology*

MITSUGU ODA, M.D.  
*Associate Professor of Anesthesiology*

TOSHIO KURASHIKI, M.D.  
*Instructor in Anesthesiology*

*Department of Anesthesiology  
Tottori University Hospital  
36-1 Nishi-machi, Yonago, 683  
Japan*

*(Accepted for publication February 3, 1988.)*

Anesthesiology  
68:959-960, 1988

## Accuracy of Expired Carbon Dioxide Partial Pressure Sampled from a Nasal Cannula. I.

*To the Editor:*—In the October, 1987, issue of ANESTHESIOLOGY, J. M. Goldman<sup>1</sup> described a system consisting of a 16-gauge angiocath passed through a nasal cannula that was used to monitor "end-tidal  $P_{CO_2}$ ." He claimed this setup may be useful in determining the "adequacy of ventilation in the sedated or narcotized patient." It was implied that the plateau on the graph of end-tidal carbon dioxide (ETCO<sub>2</sub>) as a function of time indicated that the sampled gas was end-tidal. This same arrangement has been used in the sedated patient at our institution. It does, indeed, provide information concerning respiratory rate, and may serve as a form of apnea monitor. However, one should be cautious in interpreting the ETCO<sub>2</sub> value displayed, as the sampled gas mixture most likely does *not* represent a true end-tidal gas mixture.

When properly measured, ETCO<sub>2</sub> can be a useful means of estimating arterial partial pressure of CO<sub>2</sub> (PaCO<sub>2</sub>). True ETCO<sub>2</sub> approximately equals the alveolar partial pressure (PaCO<sub>2</sub>). When studied systematically and sampled properly, end-tidal to arterial P<sub>CO<sub>2</sub></sub> gradients are small.<sup>2,3</sup> However, in previous studies where small gradients were found, a mouth piece, mask, or endotracheal tube was utilized for expired gas sampling (closed system with minimal deadspace). This minimizes gas mixture with ambient air which would act to dilute true end-tidal gas, and yield an artifactually low ETCO<sub>2</sub> value.

The open system described by Dr. Goldman, in which nasal cannulas are used for simultaneous oxygen (O<sub>2</sub>) administration, does not meet the stated conditions necessary to assure true end-tidal gas sampling. Resulting ETCO<sub>2</sub> values can be anticipated to be artifactually low. If one uses this falsely low value as a basis for administering opiates or other drugs with respiratory depressant properties, the potential danger is obvious. Further, as expired minute ventilation is decreased with opiate administration, the bias flow of O<sub>2</sub> through the cannulas comprises a large fraction of sampled gas, thus further diluting true end-tidal gas. For this reason, the system suggested cannot reliably serve as a method for determining *trends* in true ETCO<sub>2</sub>.

The data shown in figure 1 were gathered using the nasal cannula open system and a closed mask system in a volunteer. Data were collected *via* a mass spectrometer (Perkin-Elmer). A 6.7 mmHg P<sub>CO<sub>2</sub></sub> difference was seen over a 30-s period, thus illustrating the potential error in designating a sample from such an open system as "end-tidal."

WILLIAM F. URMEY, M.D.  
*Department of Anesthesia  
Brigham and Women's Hospital  
75 Francis Street  
Boston, Massachusetts 02115*

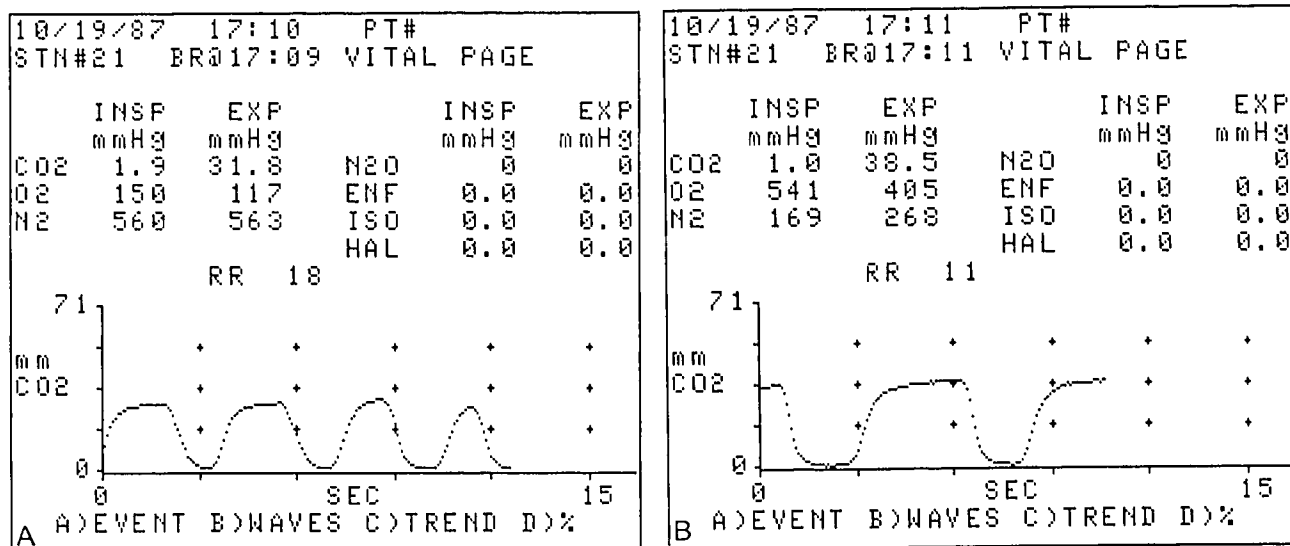

FIG. 1. Expired  $P_{CO_2}$  sampled from open nasal cannula system (A), with 300 ml/min  $O_2$  flow as compared with closed mask system (B).

## REFERENCES

1. Goldman JM: A simple, easy, and inexpensive method for monitoring  $ETCO_2$  through nasal cannulae. *ANESTHESIOLOGY* 67:606, 1987
2. Numm JH, Hill DW: Respiratory deadspace and arterial to end-

tidal  $CO_2$  tension difference in anesthetized man. *J Appl Physiol* 15:383-389, 1960

3. Raemer DB, Francis D, Philip JH, Gabel RA: Variation in  $PCO_2$  between arterial blood and peak expired gas during anesthesia. *Anesth Analg* 62:1065-1069, 1983

(Accepted for publication February 11, 1988.)

Anesthesiology  
68:960-961, 1988

## Accuracy of Expired Carbon Dioxide Partial Pressure Sampled from a Nasal Cannula. II.

*To the Editor:*—Dr. Goldman's method for measuring endtidal  $CO_2$  ( $ETCO_2$ )<sup>1</sup> via nasal cannulae cannot give an accurate value for  $ETCO_2$ . Only the respiratory rate can be measured by this method.

The expression "end-tidal concentration" is generally accepted to be alveolar concentration. In a recent study at the Mater Misericordiae Hospital, Dublin, Ireland, we compared  $Pa_{CO_2}$  and nasal peak  $CO_2$  values obtained by sampling the expired gases in the posterior pharynx of 15 patients who had received intrathecal morphine analgesia for coronary artery surgery. Respiratory depression (maximum 12-14 h post-administration)<sup>2</sup> is a recognized side effect of this therapy.

The trachea of each patient had been extubated post-surgery in the intensive care unit when core temperature was  $34^\circ C$  and respiratory effort and tidal volumes were considered acceptable clinically.

A size 6 nasopharyngeal airway was inserted after spraying with lidocaine 4%. The capnograph sampling tube was inserted 8 cm into the airway. The capnograph (Accucap®, Datascope) was allowed to stabilize for 30 min, after which time the catheter was connected. A further 15 min elapsed before arterial blood was sampled and the capnograph reading noted. The blood was analyzed immediately on the unit's ABL4 gas analyzer. Further samples were compared 10 and 20 min after the initial sampling.

A total of 45 pairs of samples were collected from the 15 patients. The results in S.I. units were analysed by linear regression analysis using a microcomputer. The coefficient of correlation ( $r$ ) was 0.59 and  $r^2$  was 0.36. The data fitted the equation  $Y = 0.55X + 2.38$ .

These results indicate that the nasopharyngeal  $p_{CO_2}$  does not correlate well with arterial  $p_{CO_2}$  and, therefore,
